# Supplementary material
Source: PubMed Central journal article supplement (PMC7042055)
Supplement: NIHMS1539872-supplement-1.pdf [file NIHMS1539872-supplement-1.pdf]

**Table S1.** Presence or absence of baseline co-morbidities during CRIC and risk of dialysis onset using fully adjusted proportional hazards models.\*

| Baseline Characteristics    | White (N=1596)        |                   |                                      | Black (N=1635)        |                   |                                      |
|-----------------------------|-----------------------|-------------------|--------------------------------------|-----------------------|-------------------|--------------------------------------|
|                             | No dialysis<br>N=1393 | Dialysis<br>N=203 | Adjusted hazard ratio<br>of dialysis | No dialysis<br>N=1160 | Dialysis<br>N=475 | Adjusted hazard ratio<br>of dialysis |
| Obesity                     | 673 (84.7)            | 122 (15.4)        | 1.08                                 | 751 (71.7)            | 296 (28.3)        | 0.68                                 |
| Not obese                   | 720 (89.9)            | 81 (10.1)         | (0.80-1.46)                          | 409 (69.6)            | 179 (30.4)        | (0.56-0.83)                          |
| Hypertension                | 1076 (85.5)           | 183 (14.5)        | 1.92                                 | 1058 (69.6)           | 463 (30.4)        | 3.69                                 |
| No hypertension             | 317 (94.1)            | 20 (5.9)          | (1.19-3.10)                          | 102 (89.5)            | 12 (10.5)         | (2.07-6.59)                          |
| Diabetes                    | 502 (79.1)            | 133 (20.9)        | 2.32                                 | 540 (64.1)            | 302 (35.9)        | 2.18                                 |
| No diabetes                 | 891 (92.7)            | 70 (7.3)          | (1.70-3.16)                          | 620 (78.2)            | 173 (21.8)        | (1.78-2.66)                          |
| MI or revascularization     | 297 (80.7)            | 71 (19.3)         | 1.37                                 | 244 (68.0)            | 115 (32.0)        | 1.24                                 |
| No MI or revascularization  | 1096 (89.3)           | 132 (10.8)        | (0.98-1.93)                          | 916 (71.8)            | 360 (28.2)        | 0.98-1.57)                           |
| Peripheral vascular disease | 78 (74.3)             | 27 (25.7)         | 1.61                                 | 72 (62.6)             | 43 (37.4)         | 1.35                                 |
| No PVD                      | 1315 (88.2)           | 176 (11.8)        | (1.05-2.47)                          | 1088 (71.6)           | 432 (28.4)        | (0.97-1.88)                          |
| Stroke                      | 100 (84.8)            | 18 (15.3)         | 0.83                                 | 155 (68.6)            | 71 (31.4)         | 1.00                                 |
| No stroke                   | 1293 (87.5)           | 185 (12.5)        | (0.50-1.38)                          | 1005 (71.3)           | 404 (28.7)        | (0.77-1.30)                          |
| Heart failure               | 81 (69.8)             | 35 (30.2)         | 2.31                                 | 137 (63.4)            | 79 (36.6)         | 1.36                                 |
| No heart failure            | 1312 (88.7)           | 168 (11.4)        | (1.54-3.47)                          | 1023 (72.1)           | 396 (27.9)        | (1.05-1.77)                          |
| Tobacco user                | 772 (85.4)            | 132 (14.6)        | 1.25                                 | 664 (70.1)            | 283 (29.9)        | 1.13                                 |
| Non-tobacco user            | 621 (89.7)            | 71 (10.3)         | (0.92-1.69)                          | 496 (72.1)            | 192 (27.9)        | (0.93-1.37)                          |
| Cancer                      | 148 (86.1)            | 24 (14.0)         | 1.45                                 | 60 (74.1)             | 21 (25.9)         | 1.16                                 |
| No cancer                   | 1245 (87.4)           | 179 (12.6)        | (0.93-2.25)                          | 1100 (70.8)           | 454 (29.2)        | (0.75-1.82)                          |

\*Models adjusted for age at baseline enrollment in CRIC, sex, income, insurance, and education, all comorbidities as listed above.

**Table S2.** Presence or absence of baseline co-morbidities during CRIC and risk of dialysis onset, accounting for competing risk of death using fully adjusted Fine-Gray models.\*

| Baseline Characteristics       | White (N=1596)        |                   |                                                            | Black (N=1635)          |                   |                                                            |
|--------------------------------|-----------------------|-------------------|------------------------------------------------------------|-------------------------|-------------------|------------------------------------------------------------|
|                                | No dialysis<br>N=1393 | Dialysis<br>N=203 | Adjusted<br>subdistribution<br>hazard ratio of<br>dialysis | No dialysis<br>(N=1160) | Dialysis<br>N=475 | Adjusted<br>subdistribution<br>hazard ratio of<br>dialysis |
| Obesity                        | 673 (84.7)            | 122 (15.4)        | 1.14<br>(0.84-1.54)                                        | 751 (71.7)              | 296 (28.3)        | 0.68<br>(0.56-0.84)                                        |
| Not obese                      | 720 (89.9)            | 81 (10.1)         |                                                            | 409 (69.6)              | 179 (30.4)        |                                                            |
| Hypertension                   | 1076 (85.5)           | 183 (14.5)        | 1.99<br>(1.22-3.27)                                        | 1058 (69.6)             | 463 (30.4)        | 3.67<br>(2.07-6.51)                                        |
| No hypertension                | 317 (94.1)            | 20 (5.9)          |                                                            | 102 (89.5)              | 12 (10.5)         |                                                            |
| Diabetes                       | 502 (79.1)            | 133 (20.9)        | 2.19<br>(1.59-3.02)                                        | 540 (64.1)              | 302 (35.9)        | 2.08<br>(1.69-2.56)                                        |
| No diabetes                    | 891 (92.7)            | 70 (7.3)          |                                                            | 620 (78.2)              | 173 (21.8)        |                                                            |
| MI or<br>revascularization     | 297 (80.7)            | 71 (19.3)         | 1.27<br>(0.90-1.81)                                        | 244 (68.0)              | 115 (32.0)        | 1.15<br>(0.91-1.46)                                        |
| No MI or<br>revascularization  | 1096 (89.3)           | 132 (10.8)        |                                                            | 916 (71.8)              | 360 (28.2)        |                                                            |
| Peripheral vascular<br>disease | 78 (74.3)             | 27 (25.7)         | 1.37<br>(0.89-2.11)                                        | 72 (62.6)               | 43 (37.4)         | 1.21<br>(0.86-1.70)                                        |
| No PVD                         | 1315 (88.2)           | 176 (11.8)        |                                                            | 1088 (71.6)             | 432 (28.4)        |                                                            |
| Stroke                         | 100 (84.8)            | 18 (15.3)         | 0.81<br>(0.46-1.43)                                        | 155 (68.6)              | 71 (31.4)         | 0.99<br>(0.76-1.29)                                        |
| No stroke                      | 1293 (87.5)           | 185 (12.5)        |                                                            | 1005 (71.3)             | 404 (28.7)        |                                                            |
| HF                             | 81 (69.8)             | 35 (30.2)         | 1.99<br>(1.33-2.96)                                        | 137 (63.4)              | 79 (36.6)         | 1.20<br>(0.91-1.58)                                        |
| No HF                          | 1312 (88.7)           | 168 (11.4)        |                                                            | 1023 (72.1)             | 396 (27.9)        |                                                            |
| Tobacco user                   | 772 (85.4)            | 132 (14.6)        | 1.23<br>(0.90-1.69)                                        | 664 (70.1)              | 283 (29.9)        | 1.07<br>(0.89-1.30)                                        |
| Non-tobacco user               | 621 (89.7)            | 71 (10.3)         |                                                            | 496 (72.1)              | 192 (27.9)        |                                                            |
| Cancer                         | 148 (86.1)            | 24 (14.0)         | 1.38<br>(0.89-2.15)                                        | 60 (74.1)               | 21 (25.9)         | 1.16<br>(0.75-1.80)                                        |
| No cancer                      | 1245 (87.4)           | 179 (12.6)        |                                                            | 1100 (70.8)             | 454 (29.2)        |                                                            |

\*Models adjusted for age at baseline enrollment in CRIC, sex, income, insurance, and education, all comorbidities as listed above.

**Table S3.** Association between race/ethnicity and mortality rates among CRIC enrollees who started dialysis between 1995-2015.

|                                                                                                    | <b>White<br/>(N=1638)</b> | <b>Black<br/>(N=1650)</b> |
|----------------------------------------------------------------------------------------------------|---------------------------|---------------------------|
| <b>Overall</b>                                                                                     |                           |                           |
| Total Person-Years                                                                                 | 11,724                    | 11,457                    |
| Number of total deaths                                                                             | 302                       | 417                       |
| Death rate (per 100 person-years) during CKD (95% CI)                                              | 2.6 (2.3-2.9)             | 3.6 (3.3-4.0)             |
| <b>CKD</b>                                                                                         |                           |                           |
| Person-years attributed to CKD                                                                     | 11,030                    | 9,831                     |
| Number of deaths during CKD                                                                        | 220                       | 262                       |
| Death rate (per 100 person-years) during CKD (95% CI)                                              | 2.0 (1.7-2.3)             | 2.7 (2.4-3.0)             |
| <b>Dialysis (excludes person-years contributed by those who received kidney transplantation)**</b> |                           |                           |
| Person-years attributed to dialysis                                                                | 548                       | 1572                      |
| Number of deaths after dialysis                                                                    | 81                        | 155                       |
| Death rate (per 100 person-years) during dialysis (95% CI)                                         | 14.8 (11.9-18.4)          | 9.9 (8.4-11.5)            |

\*\* We exclude one white participant who died after kidney transplantation in our tally in this section.
